# Supplementary material
Source: publisher figshare collection journal article supplement (https://sage.figshare.com/ndownloader/files/31540135)
Supplement: Supplementary file 1 [file 31540135]

**Supplementary material 2: International classification of diseases revision 10 Codes for functional somatic disorders and common mental disorders**

Supplement material for Social Position and Functional Somatic Disorders bySigne U. Schovsbo, Thomas M. Dantoft, Betina H. Thuesen, Katja B. Leth-Møller, Lene F. Eplov, Marie W. Petersen, Torben Jørgensen, Merete Osler in Scandinavian Journal of Public Health.

| Classification |  | **ICD–10 Codes** |
| --- | --- | --- |
| **Functional somatic disorders:** | | |
| Functional gastrointestinal disorders |  | K58-K59.9+K30 |
| Abdominal pain, unspecified |  | R10.4 |
| Chest pain, unspecified |  | R07.4 |
| Tension-type headache |  | G44.2 |
| Atypical fascial pain |  | G50.1 |
| Interstitial cystitis (chronic) |  | N30.1 |
| Postviral fatigue syndrome |  | G93.3 |
| Malaise and fatigue |  | R53 |
| Myalgia/rheumatism unspecified |  | M79.0–M79.1 |
| Fibromyalgia |  | M79.7 |
| Pain – not elsewhere classified |  | R52 |
| Temporo-mandibular joint disorders |  | K.07.6 |
| Sprain and strain of cervical spine (whiplash) |  | S13.4 |
| Somatoform disorders |  | F45–F45.1+F45.3–F45.9 |
| Neurasthenia |  | F48.0 |
| **Common mental disorders:** | | |
| *Neurotic- stress related and anxiety disorders:* | | |
| Phobic anxiety disorders |  | F40 |
| Other anxiety disorders |  | F41 |
| Obsessive-compulsive disorder |  | F42 |
| Reaction to severe stress and adjustment disorders |  | F43 |
| Dissociative (conversion) disorders |  | F44 |
| Hypochondriacal disorder |  | F45.2 |
| *Mood affective disorders:* |  |  |
| Manic episode and bipolar disorders |  | F30–F31 |
| Depressive episode and recurrent depressive disorders |  | F32–F33 |
| Other mood affective disorders |  | F34–F39 |
